# Supplementary material for: Metabolomic Reconfiguration in Primed Barley (Hordeum vulgare) Plants in Response to Pyrenophora teres f. teres Infection
Source: MDPI journal article supplement (doi:10.3390/metabo13090997), 2023-09-07
Supplement: s1 [file s1]

# Metabolomic reconfiguration in primed barley (*Hordeum vulgare* L.) plants in response to *Pyrenophora teres* f. *teres* infection

Claude Y. Hamany Djande, Fidele Tugizimana, Paul A. Steenkamp, Lizelle A. Piater and Ian A. Dubery\*.

Research Centre for Plant Metabolomics, Department of Biochemistry, University of Johannesburg, P.O. Box 524, Auckland Park, Johannesburg 2006, South Africa; claudeh@uj.ac.za (C.Y.H.D.); ftugizimana@uj.ac.za (F.T.); psteenkamp@uj.ac.za (P.A.S.); lpiater@uj.ac.za (L.A.P.).

Research Centre for Plant Metabolomics, Department of Biochemistry, University of Johannesburg, P.O. Box 524, Auckland Park, Johannesburg 2006, South Africa; 201410297@student.uj.ac.za (C.Y.H.D.); psteenkamp@uj.ac.za (P.A.S.).

\* Correspondence: idubery@uj.ac.za; Tel.: +27-11-5592401

---

**Figure S1.** Disease triangle illustrating factors contributing to the progression of disease.

**Figure S2.** Preliminary screening of cultivars from the Western Cape region of South Africa.

**Figure S3.** Fungal growth before (A) and after (B) conidia induction under near UV light (long wave).

**Figure S4.** Ultra-high performance liquid chromatography – mass spectrometry (UHPLC–MS) base peak intensity (BPI) chromatograms (negative and positive ionisation) of barley treated with 3,5-DCAA and infected with *P. teres* f. *teres* and evaluated over 2, 4 and 6 d.p.i.

**Figure S5.** Principal component analysis (PCA) score plots of ESI (–) and (+) data from shoot extracts of the ‘Hessekwa’ cultivar of *Hordeum vulgare*.

**Table S1.** Optimum parameters for the UFLC–MRM–MS quantitative analysis listing targeted standards and standard curve equation for quantification.

**Table S2.** Absolute quantification of selected metabolites in extracts from shoot tissues of primed and naïve barley plants following infection with *P. teres* f. *teres*.

**Table S3.** Annotated metabolites used for correlation network analyses. Discriminant metabolites were extracted from OPLS-DA comparing the naïve-infected (reference) *vs.* primed-infected metabolites (Condition\_A).

**Table S4.** List of all annotated (putatively identified) discriminant metabolites from leaves of the barley cultivar ‘Hessekwa’ treated/untreated with 3,5-DCAA and infected with *P. teres* f. *teres* and harvested at 2, 4 and 6 d.p.i.

**Table S5.** Metabolic pathways generated from Metabolomics Pathway Analysis (MetPA) in MetaboAnalyst 5.0 and involving annotated metabolites in primed-infected barley plants.

**Table S6.** Metabolic pathways generated from Metabolomics Pathway Analysis (MetPA) in MetaboAnalyst 5.0 and involving annotated metabolites in naïve-infected barley plants.

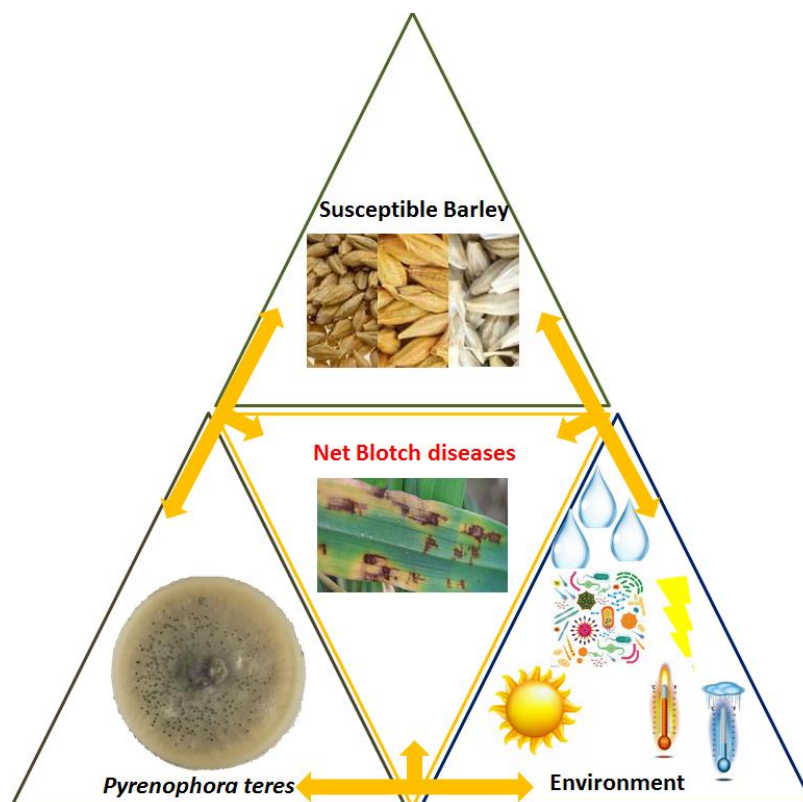

**Figure S1.** Disease triangle illustrating factors contributing to the progression of disease. The interaction of *P. teres* with a susceptible barley cultivar and in a favourable environment will result in net blotch diseases leading to important yield losses. The severity of the pathogen's spread relies heavily upon certain environmental factors, as the conidia require specific temperature (10-25 °C), relative humidity (95-100%), and leaf wetness for dispersal and germination.

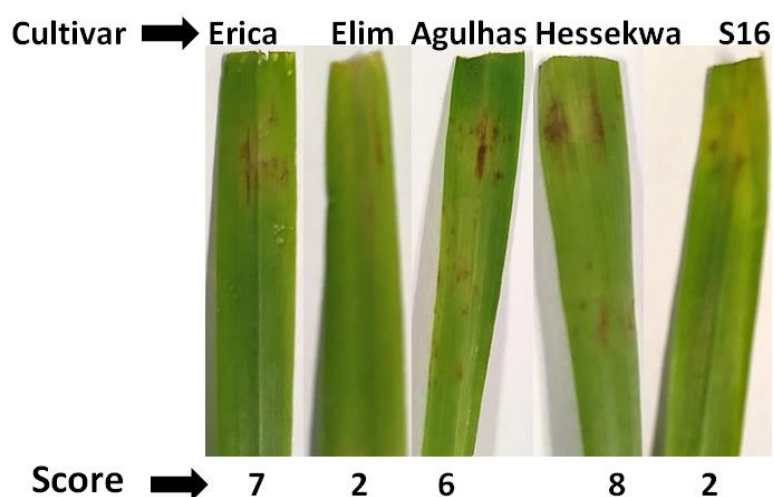

**Figure S2.** Preliminary screening of cultivars from the Western Cape region of South Africa. Barley shoot tissue segments were pressure infiltrated with a *Ptt* conidia suspension and the infection was monitored over 7 d.p.i. Net blotch net form (NBNF) disease symptoms were evaluated on a numerical scale ranging 0 to 10. 0=No symptoms; 1=Resistant; 2=Resistant to moderately resistant; 3=Moderately resistant; 4=Moderately resistant to moderately susceptible; 5=Moderately resistant to moderately susceptible; 6=Moderately resistant to moderately susceptible; 7=Moderately susceptible; 8=Moderately susceptible to susceptible; 9=Susceptible; 10=Very susceptible.

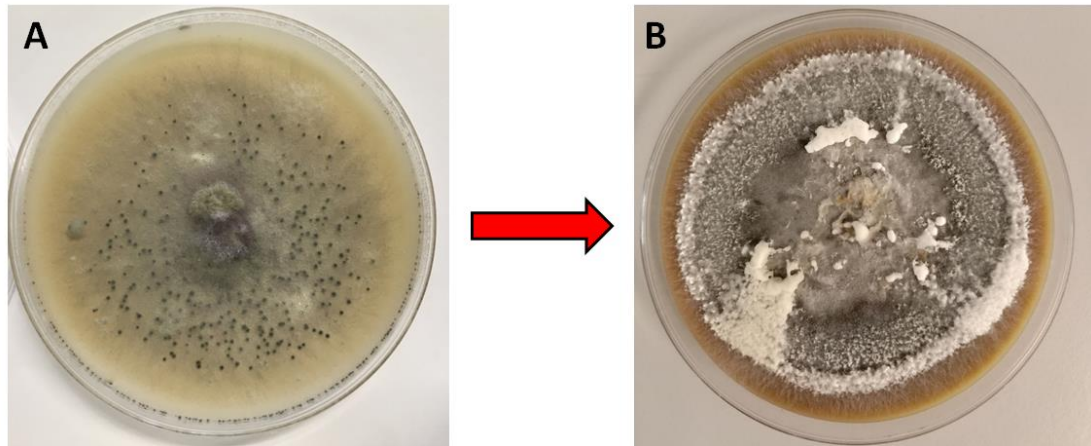

**Figure S3.** *Pyrenophora teres f. teres* fungal growth before (A) and after (B) induction of conidia under near UV light (long wave). The fungus was first initiated on V8-PDA (V8 vegetable extract-potato dextrose agar) medium and sub-cultured into a barley-oat-agar (BOA, pH 7) solid media for improved sporulation. The plates were incubated for 10 d under 12 h/12 h photoperiod at 22 °C. Ptt sporulation was induced by placing plates hydrated with 500  $\mu$ L sterile water under black light (365 nm near-UV light) for 20 h. To induce conidia formation, fungal plates were further incubated for 24 h at 15 °C in the dark (JM Gonzalez, personal communication).

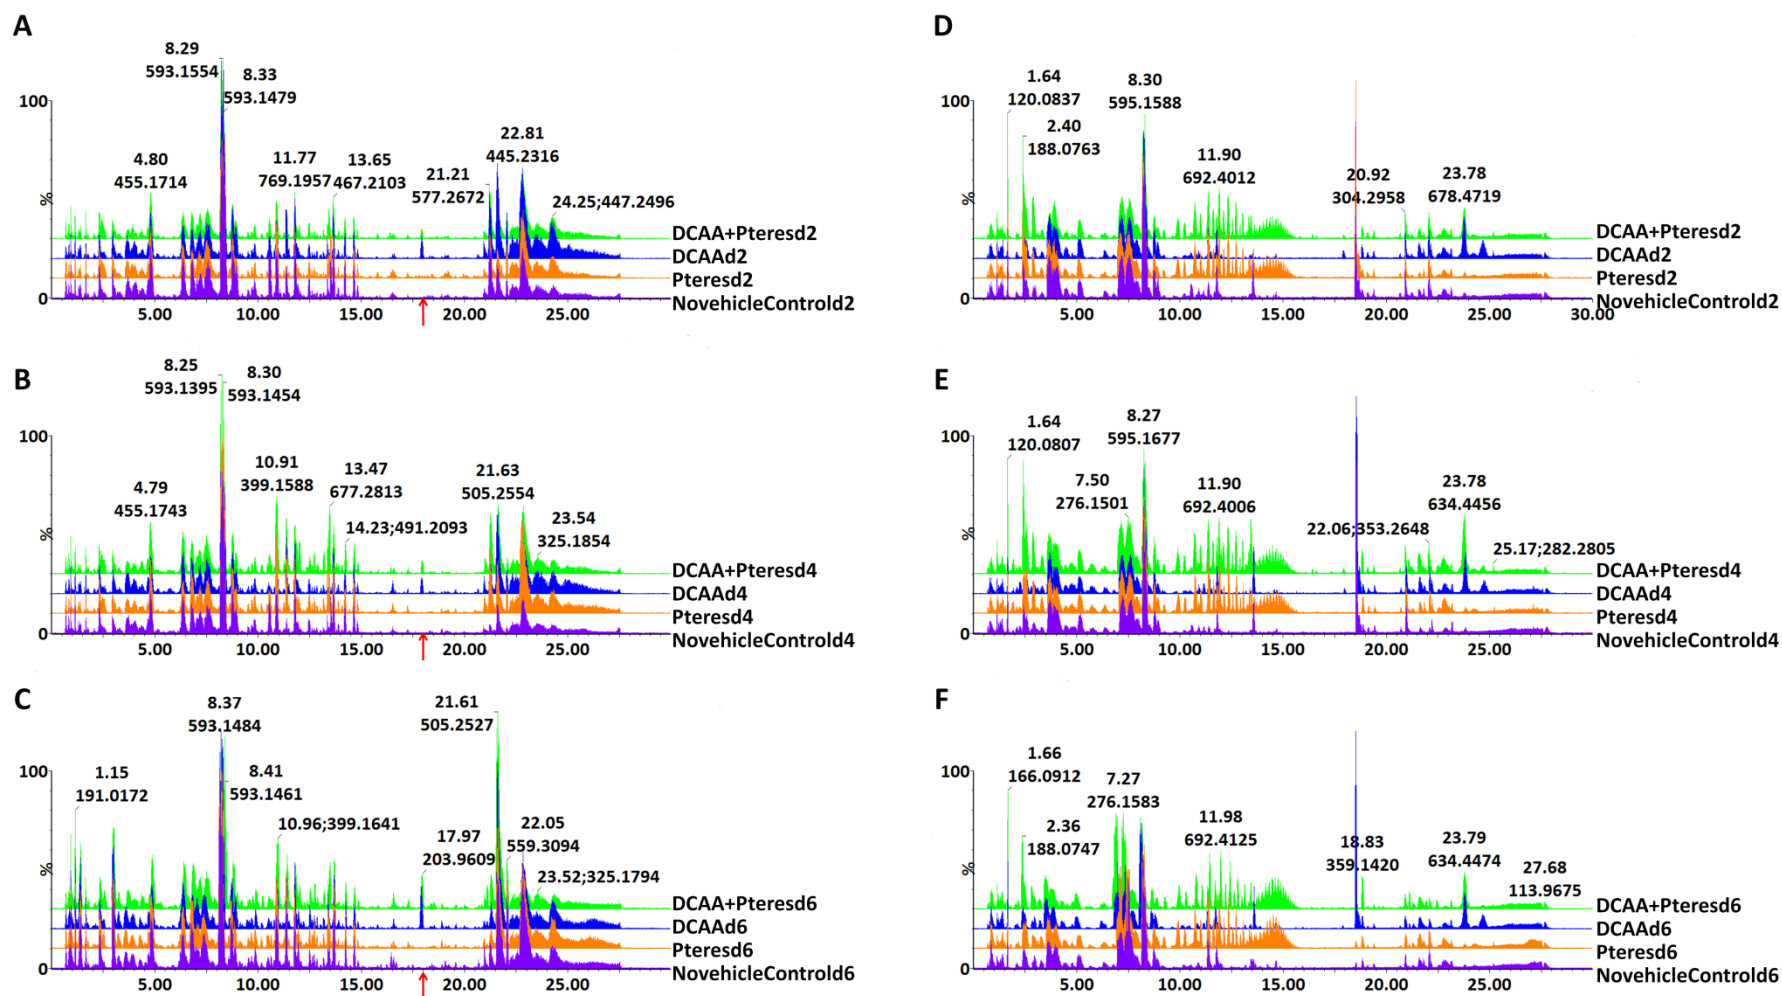

**Figure S4.** Ultra-high performance liquid chromatography – mass spectrometry (UHPLC–MS) base peak intensity (BPI) chromatograms (negative and positive ionisation) of barley treated with 3,5-DCAA and infected with *P. teres f. teres* and evaluated over 2, 4 and 6 d.p.i. (A–C): shoot extracts from ‘Hessekwa’, ESI negative data; (D–F): shoot extracts from ‘Hessekwa’, ESI positive data. The red arrows indicate the 3,5-DCAA ion peaks.

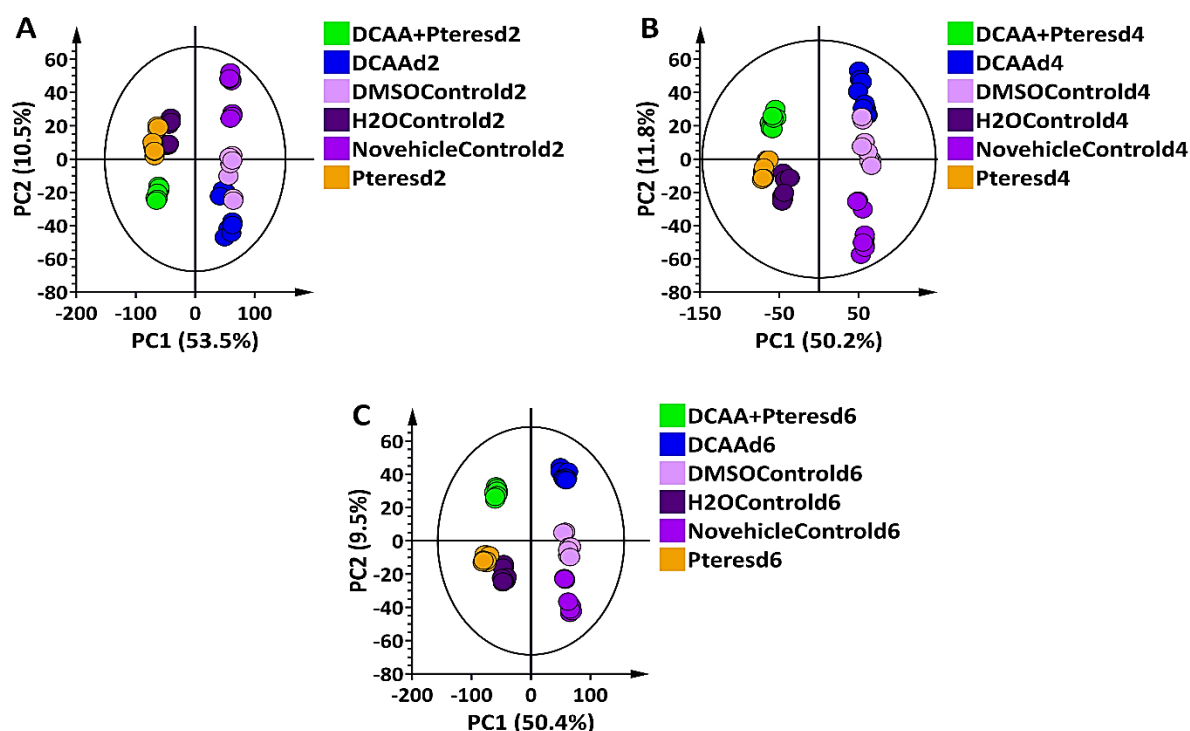

**Figure S5.** Principal component analysis (PCA) score plots of ESI (+) data from shoot extracts of the 'Hessekwa' cultivar of *Hordeum vulgare*. All data were *Pareto* scaled and the calculated Hotelling's T2 with a 95% confidence interval is represented by the ellipses present in each PCA score plot. (A): 7-component model of all conditions d2, explaining 83.6% variation and predicting 76.2% variation; (B): 5-component model of all conditions d4, explaining 78.3% variation and predicting 72.4% variation; (C): 6-component model of all conditions d2, explaining 83.6% variation and predicting 76.2% variation.

**Table S1.** Optimum parameters for the UFLC–MRM–MS quantitative analysis listing targeted standards and standard curve equation for quantification.

|    | Standards     | Precursor ion              | Rt (min) | CE             | R <sup>2</sup> | Equation                            |
|----|---------------|----------------------------|----------|----------------|----------------|-------------------------------------|
| 1  | Tyrosine      | 182.0000>136.1000          | 3.77     | -13.0          | 0.9833         | $y=1 \times 10^7 x + 1 \times 10^7$ |
| 2  | Phenylalanine | 166.0000>120.1000          | 4.69     | -14.0          | 0.9964         | $y=1 \times 10^8 x + 1 \times 10^6$ |
| 3  | Tryptophan    | 205.2000>188.0500>146.1000 | 8.12     | -15.0<br>-15.0 | 0.9852         | $y=1 \times 10^7 x + 1 \times 10^7$ |
| 4  | Cinnamic acid | 149.1678>149.1678          | 14.58    | -11.0          | 0.9856         | $y=308342x + 04994$                 |
| 5  | Ferulic acid  | 195.1878>195.1878          | 12.41    | -8.0           | 0.9938         | $y=5 \times 10^6 x + 37181$         |
| 6  | Sinapic acid  | 225.2178>225.2178          | 12.88    | -6.0           | 0.9986         | $y=6 \times 10^6 x + 78870$         |
| 7  | Caffeic acid  | 181.1678>181.1678          | 9.745    | -8.0           | 0.9840         | $y=138945x + 58079$                 |
| 8  | Gramine       | 175.2478>175.2478          | 12.28    | -9.0           | 0.9928         | $y=4 \times 10^7 x + 739066$        |
| 10 | Hordenine     | 166.2378>166.2378          | 4.87     | -10.0          | 0.9912         | $y=1 \times 10^8 x + 3 \times 10^6$ |

CE = collision energy (eV), R = regression coefficient, > = transition

**Table S2.** Absolute quantification of selected metabolites in extracts from shoot tissues of primed and naïve barley plants following infection with *P. teres f. teres*.

| Metabolites           | Concentration ( $\mu\text{g}\cdot\text{g}^{-1}$ tissue) |                   |                   |                   |                   |                   |                   |                    |                  |
|-----------------------|---------------------------------------------------------|-------------------|-------------------|-------------------|-------------------|-------------------|-------------------|--------------------|------------------|
|                       | 2 d.p.i.                                                |                   |                   | 4 d.p.i.          |                   |                   | 6 d.p.i.          |                    |                  |
|                       | Control                                                 | Infected          | Primed infected   | Control           | Infected          | Primed infected   | Control           | Infected           | Primed infected  |
| <b>Amino acids</b>    |                                                         |                   |                   |                   |                   |                   |                   |                    |                  |
| Phenylalanine         | 711.67 $\pm$ 96                                         | 1272.42 $\pm$ 57  | 1799.40 $\pm$ 87  | 689.19 $\pm$ 92   | 866.12 $\pm$ 73   | 1877.25 $\pm$ 68  | 836.73 $\pm$ 88   | 2252.90 $\pm$ 76   | 503.75 $\pm$ 60  |
| Tyrosine              | 192.9172 $\pm$ 24                                       | 619.34 $\pm$ 40   | 357.87 $\pm$ 18   | 99.45626 $\pm$ 28 | 233.98 $\pm$ 16   | 1.39 $\pm$ 22     | 0.00 $\pm$ 0      | 102.47 $\pm$ 16    | 0.00 $\pm$ 0     |
| Tryptophan            | 1347.93 $\pm$ 111                                       | 4627.69 $\pm$ 400 | 7152.21 $\pm$ 187 | 2008.71 $\pm$ 284 | 3895.35 $\pm$ 521 | 8266.72 $\pm$ 564 | 3787.65 $\pm$ 631 | 12694.25 $\pm$ 279 | 3444.06 $\pm$ 95 |
| <b>Phenolic acids</b> |                                                         |                   |                   |                   |                   |                   |                   |                    |                  |
| Cinnamic acid         | 15.61 $\pm$ 7                                           | 15.67 $\pm$ 9     | 41.04 $\pm$ 11    | 10.14 $\pm$ 5     | 13.03 $\pm$ 5     | 13.20 $\pm$ 4     | 18.63 $\pm$ 3     | 30.40 $\pm$ 7      | 20.09 $\pm$ 6    |
| Caffeic acid          | 228.96 $\pm$ 88                                         | 226.32 $\pm$ 74   | 811.77 $\pm$ 81   | 202.57 $\pm$ 90   | 263.86 $\pm$ 82   | 320.44 $\pm$ 14   | 330.37 $\pm$ 49   | 190.58 $\pm$ 99    | 356.92 $\pm$ 11  |
| Ferulic acid          | 17.81 $\pm$ 3                                           | 20.43 $\pm$ 5     | 23.21 $\pm$ 4     | 24.60 $\pm$ 5     | 21.95 $\pm$ 4     | 13.53 $\pm$ 3     | 18.74 $\pm$ 5     | 21.09 $\pm$ 5      | 14.47 $\pm$ 3    |
| Sinapic acid          | 47.40 $\pm$ 9                                           | 26.78 $\pm$ 14    | 40.24 $\pm$ 12    | 42.33 $\pm$ 02    | 50.38 $\pm$ 16    | 52.12 $\pm$ 19    | 22.03 $\pm$ 10    | 86.45 $\pm$ 12     | 30.22 $\pm$ 16   |
| <b>Alkaloids</b>      |                                                         |                   |                   |                   |                   |                   |                   |                    |                  |
| Hordenine             | 21.59 $\pm$ 1                                           | 25.12 $\pm$ 2     | 29.88 $\pm$ 2     | 21.00 $\pm$ 1     | 17.57 $\pm$ 6     | 24.65 $\pm$ 4     | 32.40 $\pm$ 5     | 41.66 $\pm$ 6      | 23.59 $\pm$ 4    |
| Gramine               | 43.69 $\pm$ 8                                           | 28.79 $\pm$ 5     | 40.68 $\pm$ 7     | 36.92 $\pm$ 5     | 47.04 $\pm$ 6     | 63.55 $\pm$ 5     | 45.34 $\pm$ 7     | 78.46 $\pm$ 8      | 67.90 $\pm$ 6    |

Quantitative values are expressed as  $\mu\text{g/g}$  tissue. The  $\pm$  indicates the standard deviation of n = 9 determinations.

**Table S3.** Annotated metabolites used for correlation network analyses. Discriminant metabolites were extracted from OPLS-DA comparing the naïve-infected (reference) *vs.* primed-infected metabolites (Condition\_A).

| PubChem ID | KEGG ID | Simplified Molecular Input Line Entry System (SMILES)                                                   | Compound Name             | P-value | Fold change |
|------------|---------|---------------------------------------------------------------------------------------------------------|---------------------------|---------|-------------|
| 5202       | C00780  | <chem>C1=CC2=C(C=C1O)C(=CN2)CCN</chem>                                                                  | Hydroxy-tryptamine        | 0.003   | 1.223       |
| 5280691    | C04498  | <chem>C1=CC(=CC=C1C=CC(=O)NCCCCN=C(N)N)O</chem>                                                         | Coumaroy-lagmatine        | 0.313   | 2.786       |
| 6305       | C00078  | <chem>C1=CC=C2C(=C1)C(=CN2)CC(C(=O)O)N</chem>                                                           | Tryptophan                | 0.330   | 1.030       |
| 6140       | C00079  | <chem>C1=CC=C(C=C1)CC(C(=O)O)N</chem>                                                                   | Phenylalanine             | 0.386   | 1.579       |
| 6057       | C00082  | <chem>C1=CC(=CC=C1CC(C(=O)O)N)O</chem>                                                                  | Tyrosine                  | 0.000   | 1.659       |
| 525        | C00149  | <chem>C(C(C(=O)O)O)C(=O)O</chem>                                                                        | Malic acid                | 0.001   | 0.609       |
| 311        | C00158  | <chem>C(C(=O)O)C(CC(=O)O)(C(=O)O)O</chem>                                                               | Citric acid               | 0.213   | 1.112       |
| 6287       | C00183  | <chem>CC(C)C(C(=O)O)N</chem>                                                                            | Valine                    | 0.018   | 0.822       |
| 1198       | C00311  | <chem>C(C(C(C(=O)O)O)C(=O)O)C(=O)O</chem>                                                               | Isocitric acid            | 0.739   | 0.982       |
| 6306       | C00407  | <chem>CCC(C)C(C(=O)O)N</chem>                                                                           | Isoleucine                | 0.114   | 0.687       |
| 637542     | C00811  | <chem>C1=CC(=CC=C1C=CC(=O)O)O</chem>                                                                    | Coumaric acid             | 0.117   | 0.926       |
| 162350     | C01714  | <chem>C1=CC(=CC=C1C2=CC(=O)C3=C(O2)C=C(C(=C3O)C4C(C(C(C(O4)CO)O)O)O)O)O</chem>                          | Isovitexin                | 0.757   | 0.905       |
| 442611     | C05990  | <chem>COC1=C(C=CC(=C1)C2=CC(=O)C3=C(O2)C=C(C(=C3O)C4C(C(C(C(O4)CO)O)O)O)O)O</chem>                      | Isoscoparin               | 0.019   | 3.818       |
| 44258179   | C05990  | <chem>COC1=C(C=CC(=C1)C2=CC(=O)C3=C(C(=C(C=C3O2)OC4C(C(C(C(O4)CO)O)O)O)C5C(C(C(C(O5)CO)O)O)O)O)O</chem> | Isoscoparin 7-O-glucoside | 0.617   | 1.031       |
| 5280934    | C06427  | <chem>CCC=CCC=CCC=CCCCCCCCC(=O)O</chem>                                                                 | alpha-Linolenic acid      | 0.263   | 0.455       |
| 16061067   | C07354  | <chem>CCC=CCC(C(CC=CCCCCCCCC(=O)O)O)O</chem>                                                            | 9K,12,13-diHODE           | 0.025   | 0.690       |
| 441381     | C08064  | <chem>C1=CC(=CC=C1C2=CC(=O)C3=C(C(=C(C=C3O2)OC4C(C(C(C(O4)CO)O)O)O)C5C(C(C(C(O5)CO)O)O)O)O)O</chem>     | Saponarin                 | 0.115   | 0.644       |
| 45485025   | C08307  | <chem>C1=CC(=CC=C1C2C(C3=C(O2)C=CC(=C3)C=CC(=O)NCCCCN=C(N)N)C(=O)NCCCCN=C(N)N)O</chem>                  | Hordatine A               | 0.460   | 2.110       |
| 72193633   | C08308  | <chem>COC1=CC(=CC2=C1OC(C2C(=O)NCCCCN=C(N)N)C3=CC=C(C=C3)O)C=CC(=O)NCCCCN=C(N)N</chem>                  | Hordatine B               | 0.478   | 2.040       |
| 7016562    | C10172  | <chem>C[N+](C(CCCC1C(=O)[O-])C</chem>                                                                   | Proline betaine           | 0.286   | 0.678       |
| 5281762    | C10434  | <chem>C1C(C(C(C=C1C(=O)O)O)O)OC(=O)C=CC2=CC(=C(C=C2)O)O</chem>                                          | Caffeoylshikimate         | 0.004   | 0.841       |

|           |        |                                                                                                                             |                                        |       |       |
|-----------|--------|-----------------------------------------------------------------------------------------------------------------------------|----------------------------------------|-------|-------|
| 90478782  | C12208 | <chem>C1C(C(C(C1(C(=O)O)O)OC(=O)C=CC2=CC=C(C=C2)O)O)O</chem>                                                                | 3-O-p-Coumaroyl-quinic acid            | 0.093 | 0.934 |
| 10708957  | C16346 | <chem>CC(C=CCC=CCC=CCCCCCCCC(=O)O)O</chem>                                                                                  | Hydroxylinolenic acid                  | 0.000 | 0.313 |
| 6439562   | C18326 | <chem>C1=CC(=CC=C1C=CC(=O)NCCCCN)O</chem>                                                                                   | p-Coumaroyl-putrescine                 | 0.000 | 0.516 |
| 129892683 |        | <chem>COC1=C(C=CC(=C1)C=CC(=O)C(C(CO)O)(C(=O)C=CC2=CC(=C(C=C2)O)O)O)O</chem>                                                | 1,3-O-Feruloyl-caffeoyl-glycerol       | 0.018 | 0.585 |
| 44257758  |        | <chem>C1=CC(=CC=C1C2=CC(=O)C3=C(C(=C(C=C3O2)OC4C(C(C(C(O4)CO)O)O)O)C5C(C(C(C(O5)C O)O)O)OC6C(C(C(C(O6)CO)O)O)O)O)O</chem>   | Isovitexin 7,6"-di-O-glucoside         | 0.149 | 1.694 |
| 44468060  |        | <chem>C1C(C(C(C(O1)OC2C(C(C(OC2C3=C(C4=C(C=C3O)OC(=CC4=O)C5=CC=C(C=C5)O)O)CO)O)O)O)O</chem>                                 | Isovitexin 2"-O-arabinoside            | 0.274 | 3.102 |
| 44559810  |        | <chem>C1=CC(=C(C=C1C2=CC(=O)C3=C(C(=C(C=C3O2)OC4C(C(C(C(O4)CO)O)O)O)C5C(C(C(C(O5)C O)O)O)O)O)O</chem>                       | Lutonarin                              | 0.000 | 1.651 |
| 44815853  |        | <chem>C1CC(=O)C(C1CC(=O)O)CC=CCCO5(=O)(=O)O</chem>                                                                          | 12-hydroxy-jasmonate sulfate           | 0.006 | 0.886 |
| 46173376  |        | <chem>COC1=C(C=CC(=C1)C=CC(=O)NCCCCN=C(N)N)O</chem>                                                                         | Feruloyagmatine                        | 0.189 | 0.650 |
| 71728415  |        | <chem>COC1=C(C=C(C=C1)C=CC(=O)OCC2C(C(C(C(O2)OC3=C(C(=C4C(=C3)OC(=CC4=O)C5=CC=C(C=C5)O)O)C6C(C(C(C(O6)CO)O)O)O)O)O)O</chem> | Isovitexin 7-O-[X"-feruloyl]-glucoside | 0.084 | 0.925 |
| 75536015  |        | <chem>CCCC(CC=CCC=CCCCCCCCC(=O)O)O</chem>                                                                                   | Hydroxylinoleic acid                   | 0.087 | 0.707 |
| 129830108 |        | <chem>COC1=CC(=CC(=C1O)OC)C=CC(=O)N(CCCCN=C(N)N)O</chem>                                                                    | Sinapoylhydroxy-agmatine               | 0.514 | 0.834 |
| 129852215 |        | <chem>COC1=C(C=CC(=C1)C=CC(=O)N(CCCCN=C(N)N)O)O</chem>                                                                      | Feruloylhydroxy-agmatine               | 0.877 | 0.893 |
| 131751022 |        | <chem>COC1=CC(=CC2=C1OC(C2C(=O)NCCCCN=C(N)N)C3=CC=C(C=C3)OC4C(C(C(C(O4)CO)O)O)O)C=CC(=O)NCCCCN=C(N)N</chem>                 | Hordatine B glucoside                  | 0.501 | 1.971 |
| 131751024 |        | <chem>C1=CC(=CC=C1C2C(C3=C(O2)C(=CC(=C3)C=CC(=O)NCCCCN=C(N)N)O)C(=O)NCCCCN=C(N)N)OC4C(C(C(C(O4)CO)O)O)O</chem>              | Hordatine A glucoside                  | 0.001 | 0.326 |
| 131698836 |        | <chem>C1CC(=O)NC1C(=O)O</chem>                                                                                              | 5-Oxo-proline                          | 0.000 | 1.586 |
| 10329583  |        | <chem>C(C(CC(=O)O)CO)C(=O)O</chem>                                                                                          | Hydroxymethyl-glutaric acid            | 0.213 | 0.748 |
| 129694157 |        | <chem>C1=CC(=CC=C1C=CC(=O)N(CCCCN=C(N)N)O)O</chem>                                                                          | Coumaroylhydroxy-agmatine              | 0.008 | 1.148 |
| 51351495  |        | <chem>COC1=C(C=C(C=C1)C=CC(=O)NCCC2=CNC3=C2C=C(C=C3)O)O</chem>                                                              | N-Isoferuloyl-serotonin                | 0.287 | 1.325 |
| 5458878   |        | <chem>C1=CC=C2C(=C1)C(=CN2)CCNC(=O)C=CC3=CC=C(C=C3)O</chem>                                                                 | Coumaroyl-tryptamine                   | 0.001 | 0.796 |



**Table S4.** List of all annotated (putatively identified) discriminant metabolites from shoots of the barley cultivar ‘Hessekwa’ treated/untreated with 3,5-DCAA and infected with *P. teres* f. *teres* and harvested at 2, 4 and 6 d.p.i. The features were extracted from the multivariate OPLS-DA S-plots and the fold changes were calculated using a SIMCA software algorithm and are indicated where a metabolite was selected as a significant biomarker, either up- or down-regulated.

|    | Ionisation mode | Compound names                         | Rt (min) | m/z     | DCAA+Ptt |          |          | Ptt      |          |          |
|----|-----------------|----------------------------------------|----------|---------|----------|----------|----------|----------|----------|----------|
|    |                 |                                        |          |         | 2 d.p.i. | 4 d.p.i. | 6 d.p.i. | 2 d.p.i. | 4 d.p.i. | 6 d.p.i. |
|    |                 | <b>Amino acids</b>                     |          |         |          |          |          |          |          |          |
| 1  | Pos             | Tyrosine*                              | 1.13     | 182.082 | Up       | Up       |          | Up       | Up       | Up       |
| 2  | Neg             | 5-Oxo-DL-proline                       | 1.14     | 128.033 | Up       |          | Up       |          |          |          |
| 3  | Neg             | Phenylalanine*                         | 1.63     | 164.069 | Up       | Up       | Down     | Up       |          |          |
| 4  | Neg             | Tryptophan*                            | 2.40     | 203.081 | Up       | Up       |          | Up       | Up       | Up       |
|    |                 | <b>Organic acids</b>                   |          |         |          |          |          |          |          |          |
| 5  | Neg             | Citric acid                            | 1.14     | 191.018 |          |          |          | Up       |          |          |
|    |                 | <b>Phenolic acids and derivatives</b>  |          |         |          |          |          |          |          |          |
| 6  | Neg             | Caffeoylshikimate derivative isomer I  | 10.24    | 679.261 |          |          |          | Up       |          | Up       |
| 7  | Neg             | Caffeoylshikimate derivative isomer II | 10.59    | 679.261 |          |          |          |          |          | Up       |
| 8  | Neg             | Coumaroylglucosylglycerol              | 10.86    | 399.163 |          | Up       |          | Up       | Up       | Up       |
| 9  | Neg             | Gallic acid monohydrate                | 12.41    | 187.096 |          |          |          |          |          | Up       |
| 10 | Neg             | 1,3-O-Feruloylcaffeoylglycerol         | 12.78    | 429.175 |          |          | Up       |          |          | Up       |
| 11 | Pos             | Cinnamic acid*                         | 14.58    | 149.167 | Up       |          |          |          |          |          |
| 12 | Pos             | Caffeic acid*                          | 9.745    | 181.167 | Up       |          |          |          |          |          |
| 13 | Pos             | Ferulic acid*                          | 12.41    | 195.187 |          | Down     |          |          |          |          |
| 14 | Pos             | Sinapic acid*                          | 12.88    | 225.217 |          |          |          | Down     |          | Up       |
| 15 | Neg             | Coumaroylhydroxyagmatine               | 2.46     | 291.146 | Up       |          |          | Up       |          |          |
| 16 | Pos             | Coumaroylagmatine                      | 3.92     | 277.164 |          | Down     |          |          | Down     |          |
| 17 | Neg             | p-Coumaroylputrescine                  | 2.32     | 235.145 |          |          |          | Up       |          |          |
| 18 | Neg             | Sinapoylhydroxyagmatine                | 6.36     | 351.127 | Down     |          |          |          | Down     |          |
| 19 | Pos             | Hordatine B glucoside                  | 3.58     | 372.181 | Down     | Down     | Down     | Down     | Down     | Down     |
| 20 | Pos             | Hordatine A glucoside isomer I         | 3.87     | 357.177 |          |          | Down     |          |          | Down     |
| 21 | Neg             | Hordatine A glucoside isomer II        | 4.01     | 757.353 | Down     | Down     |          |          |          |          |
| 22 | Pos             | Hordatine B                            | 7.18     | 291.156 | Down     | Down     | Down     | Down     | Down     | Down     |

|    |     |                                         |       |         |      |      |      |      |      |      |
|----|-----|-----------------------------------------|-------|---------|------|------|------|------|------|------|
| 23 | Pos | Hordatine A                             | 7.56  | 276.151 | Down | Down | Down | Down | Down |      |
|    |     | <b>Flavonoids</b>                       |       |         |      |      |      |      |      |      |
| 24 | Pos | Lutonarin                               | 6.38  | 611.159 | Up   |      |      |      |      |      |
| 25 | Pos | Saponarin                               | 8.18  | 595.167 | Down | Down | Down | Down | Down | Down |
| 26 | Pos | Isovitexin 7-O-rhamnosylglucoside       | 8.67  | 741.22  | Down | Down | Down | Down | Down | Down |
| 27 | Neg | Isoscoparin 7-O-glucoside               | 8.87  | 623.16  | Down | Down |      | Down | Down |      |
| 28 | Neg | Isoscoparin 7-O-[6"-sinapoyl]-glucoside | 11.48 | 829.221 | Up   |      |      |      |      |      |
| 29 | Neg | Isovitexin 7,6" -di-O-glucoside         | 10.43 | 755.301 | Up   |      |      | Up   |      | Up   |
| 30 | Neg | Isovitexin                              | 10.53 | 431.097 | Down | Down |      | Down | Down |      |
| 31 | Neg | Isovitexin 7-O-[6"-sinapoyl]-glucoside  | 11.36 | 799.209 |      | Up   | Down | Down | Up   | Down |
| 32 | Neg | Isovitexin 7-O-[X"-feruloyl]-glucoside  | 11.78 | 769.199 | Down | Down | Down | Down | Down | Down |
| 33 | Neg | 6-Prenylnaringenin                      | 19.09 | 339.217 |      |      |      |      |      | Down |
|    |     | <b>Alkaloids</b>                        |       |         |      |      |      |      |      |      |
| 34 | Pos | Hordenine*                              | 4.87  | 166.237 | Up   |      | Down | Down | Down | Up   |
| 35 | Pos | Gramine*                                | 12.28 | 175.247 |      | Up   | Up   | Down | Up   | Up   |
| 36 | Neg | N-Isoferuloyl serotonin                 | 2.42  | 351.129 |      |      | Up   |      |      | Up   |
| 37 | Neg | Coumaroyltryptamine                     | 2.55  | 289.13  | Up   |      | Up   | Up   |      | Up   |
| 38 | Pos | Hydroxytryptamine                       | 1.64  | 177.104 | Up   |      |      |      |      |      |
|    |     | <b>Fatty acids and derivatives</b>      |       |         |      |      |      |      |      |      |
| 39 | Neg | 12-hydroxyjasmonate sulphate            | 4.36  | 305.069 |      |      |      | Up   |      |      |
| 40 | Neg | Linolenic derivative I                  | 20.95 | 675.358 | Up   |      |      |      |      |      |
| 41 | Neg | Hydroxylinolenic acid                   | 21.57 | 293.211 |      |      |      | Up   |      |      |
| 42 | Neg | alpha-Linolenic acid                    | 22.05 | 277.216 |      |      |      |      | Up   |      |
| 43 | Pos | Linolenoylglycerol                      | 22.07 | 353.267 |      |      | Down |      |      |      |
| 44 | Neg | Linolenic derivative II                 | 22.81 | 445.233 | Up   |      | Down |      | Up   | Down |

(\*) metabolites quantified using the MRM method.

**Table S5.** Metabolic pathways generated from Metabolomics Pathway Analysis (MetPA) in MetaboAnalyst 5.0 and involving annotated metabolites in **primed-infected** barley plants.

| Pathway Name                                           | <i>p</i> -value | Impact |
|--------------------------------------------------------|-----------------|--------|
| Phenylpropanoid biosynthesis                           | 6.59E-07        | 0.048  |
| Phenylalanine, tyrosine and tryptophan biosynthesis    | 1.35E-03        | 0.021  |
| Tryptophan metabolism                                  | 0.002           | 0.249  |
| Phenylalanine metabolism                               | 0.007           | 0.423  |
| Aminoacyl-tRNA biosynthesis                            | 0.011           | 0      |
| Ubiquinone and other terpenoid-quinone biosynthesis    | 0.052           | 0      |
| Biosynthesis of secondary metabolites - unclassified   | 0.052           | 0      |
| Isoquinoline alkaloid biosynthesis                     | 0.063           | 0.411  |
| Tropane, piperidine and pyridine alkaloid biosynthesis | 0.083           | 0      |
| Flavone and flavonol biosynthesis                      | 0.122           | 0      |
| Tyrosine metabolism                                    | 0.177           | 0.167  |
| Citrate cycle (TCA cycle)                              | 0.195           | 0.115  |
| Biosynthesis of unsaturated fatty acids                | 0.212           | 0      |
| Starch and sucrose metabolism                          | 0.212           | 0.089  |
| Glutathione metabolism                                 | 0.254           | 0.012  |
| Galactose metabolism                                   | 0.254           | 0.042  |
| alpha-Linolenic acid metabolism                        | 0.254           | 0.114  |
| Arginine and proline metabolism                        | 0.262           | 0.003  |
| Glyoxylate and dicarboxylate metabolism                | 0.270           | 0.007  |
| Glycine, serine and threonine metabolism               | 0.302           | 0      |

**Table S6.** Metabolic pathways generated from Metabolomics Pathway Analysis (MetPA) in MetaboAnalyst 5.0 and involving annotated metabolites in **naïve-infected** barley plants.

| Pathway Name                                           | <i>p</i> -value | Impact |
|--------------------------------------------------------|-----------------|--------|
| Phenylalanine, tyrosine and tryptophan biosynthesis    | 3.75E-04        | 0.022  |
| Tryptophan metabolism                                  | 4.29E-04        | 0.241  |
| Phenylpropanoid biosynthesis                           | 0.002           | 0.051  |
| Aminoacyl-tRNA biosynthesis                            | 0.003           | 0      |
| Isoquinoline alkaloid biosynthesis                     | 0.042           | 0.411  |
| Tropane, piperidine and pyridine alkaloid biosynthesis | 0.056           | 0      |
| Stilbenoid, diarylheptanoid and gingerol biosynthesis  | 0.076           | 0.115  |
| Flavone and flavonol biosynthesis                      | 0.082           | 0      |
| Phenylalanine metabolism                               | 0.082           | 0.423  |
| Tyrosine metabolism                                    | 0.122           | 0.168  |
| Biosynthesis of unsaturated fatty acids                | 0.147           | 0      |
| Starch and sucrose metabolism                          | 0.147           | 0.089  |
| Galactose metabolism                                   | 0.177           | 0.042  |
| alpha-Linolenic acid metabolism                        | 0.177           | 0.114  |
| Arginine and proline metabolism                        | 0.183           | 0.003  |
| Glycine, serine and threonine metabolism               | 0.212           | 0      |
| Ubiquinone and other terpenoid-quinone biosynthesis    | 0.224           | 0      |
| Flavonoid biosynthesis                                 | 0.290           | 0.021  |
